# Supplementary material for: Near-Infrared Light Increases Functional Connectivity with a Non-thermal Mechanism
Source: PubMed Central journal article supplement (PMC8152883; doi:10.1093/texcom/tgaa004), 2020-03-19
Supplement: supplement_tgaa004.pdf [file supplement_tgaa004.pdf]

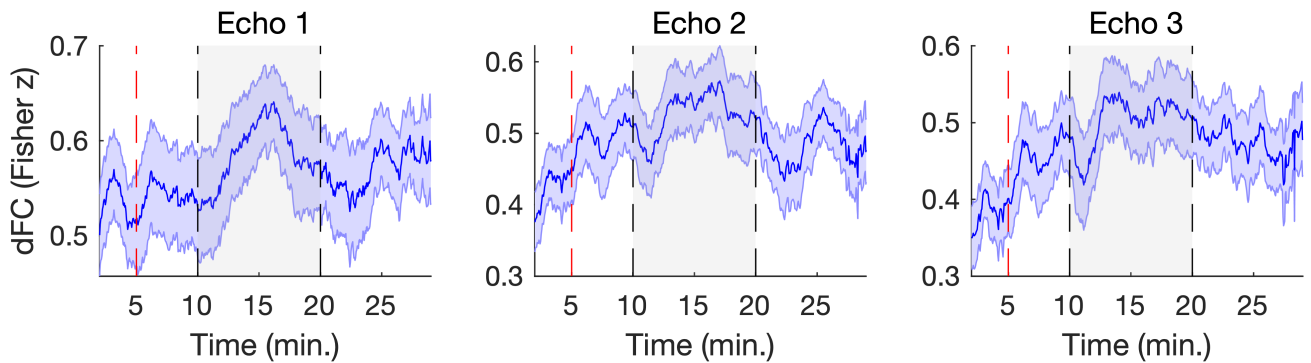

Figure S1: Exclusion of first 5 minutes of BOLD due to transient functional connectivity. The time course of total connectivity with the illuminated region for Echo 1 (left), Echo 2 (middle), and Echo 3 (right). Connectivity exhibited a transient drift during the first five minutes of the pre-illumination period before reaching a stable value at approximately five minutes (indicated with vertical dashed red line). Consequently, we excluded the first five minutes of the baseline period from further analysis.

| Layer | Refractive Index | Absorption Coefficient ( $\mu_a$ ) | Scattering Coefficient ( $\mu_s$ ) | Anisotropy Factor ( $g$ ) | Thickness (cm) |
|-------|------------------|------------------------------------|------------------------------------|---------------------------|----------------|
| Scalp | 1.41             | 0.2                                | 31.25                              | 0.52                      | 0.6            |
| Skull | 1.56             | 0.07                               | 130                                | 0.9                       | 0.65           |
| CSF   | 1.33             | 0.02                               | 0.1                                | 0.9                       | 0.2            |
| Brain | 1.4              | 0.084                              | 90                                 | 0.9                       | 8              |

Table S1: Physical and optical properties of the four-layer head model employed in the simulation of light propagation. Whenever possible, we have used *in vivo* optical properties. In particular, while MCML requires separate specification of  $\mu_s$  and  $g$ , *in vivo* values for the reduced scattering coefficient  $\mu'_s \equiv \mu_s(1 - g)$  and  $g$  are more readily available. As such, we have inferred values of  $\mu_s$  from reported values of  $\mu'_s$  and  $g$ . All values of  $\mu_a$  and  $\mu_s$  are in units of  $\text{cm}^{-1}$ .

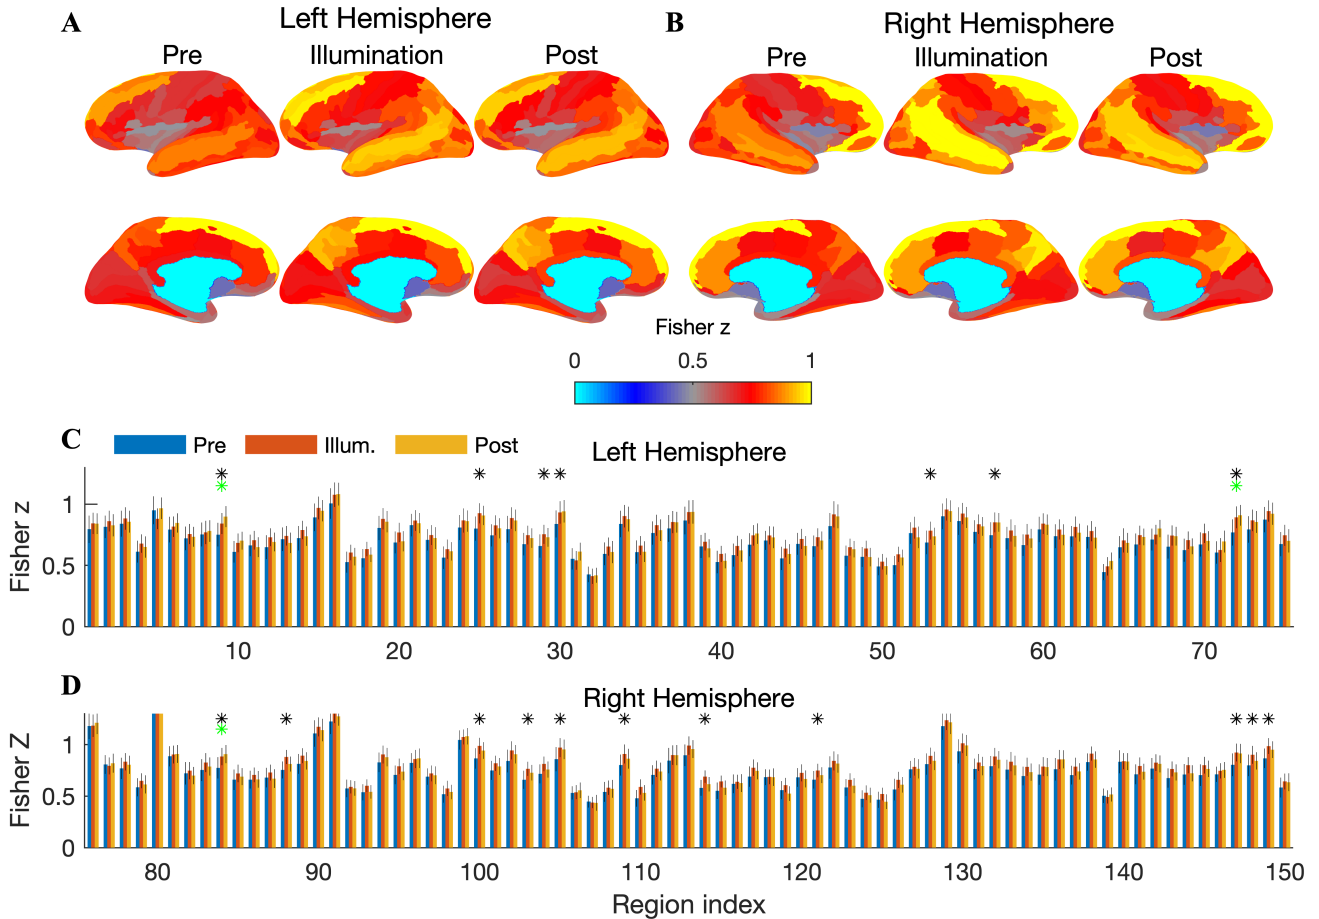

Figure S2: Increased functional connectivity with the illuminated region at Echo 1. **(A)** Cortical surfaces depict the Fisher transformed Pearson correlation between the illuminated region and all ROIs in the left hemisphere, shown separately for the pre-illumination, illumination, and post-illumination period. **(B)** Same as **(A)** but now showing connectivity between the illuminated region and ROIs in the right hemisphere. **(C)** Bar graphs depict the mean connectivity before, during, and after illumination for each ROI in the left hemisphere. Asterisks denote a significant increase during illumination. Green asterisks denote a significant post-illumination effect, which here was only observed with connections to three ROIs in the parietal cortices. **(D)** Same as **(C)** but now showing connectivity with the right hemisphere. Across both hemispheres, 18 ROIs exhibited a significant increase in connectivity with the illuminated region during illumination.

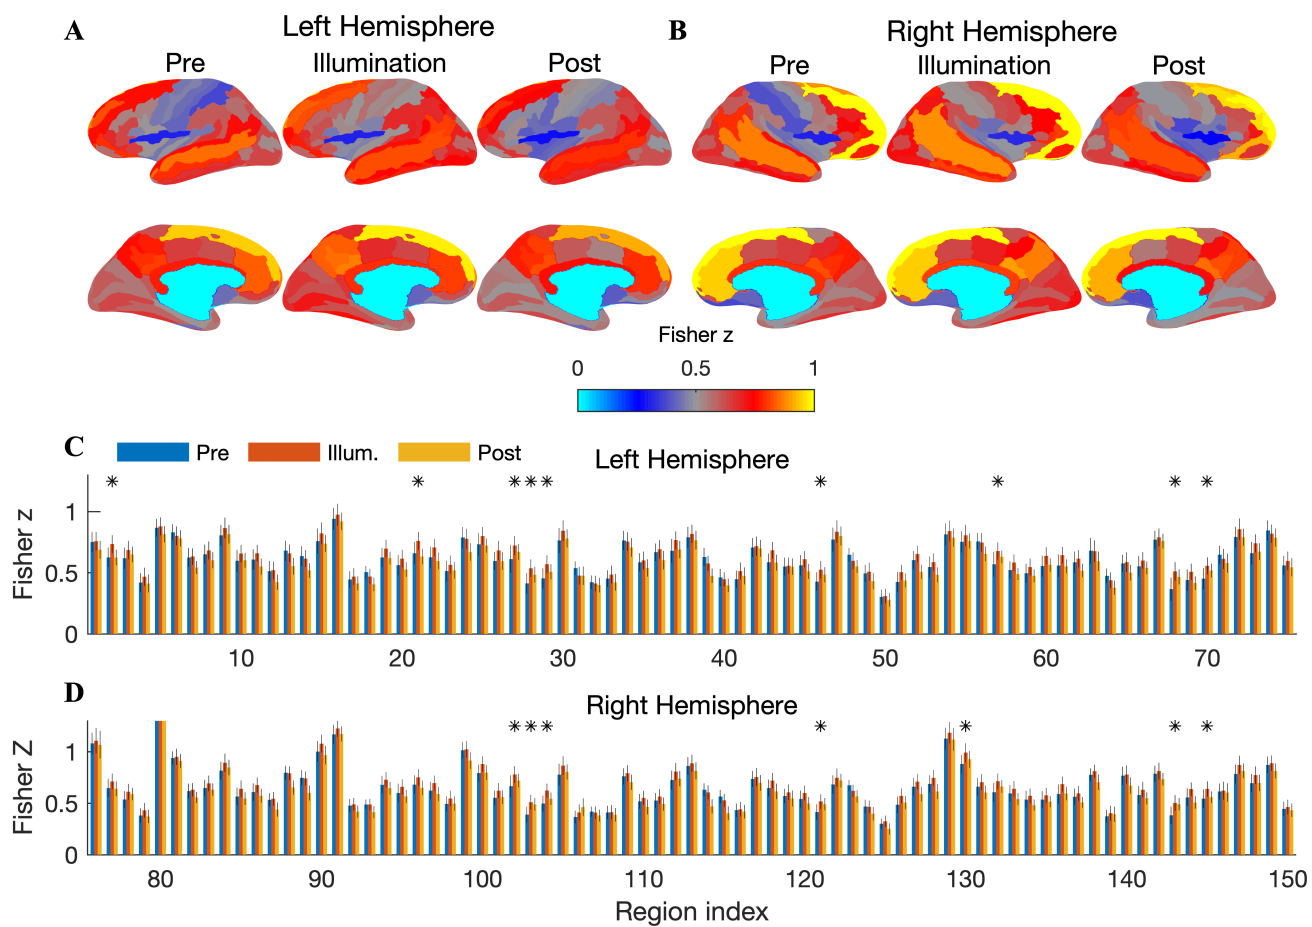

Figure S3: Increased functional connectivity with the illuminated region at Echo 2. Panels match those of Figure S2. A total of 16 ROIs exhibited a significant acute increase in connectivity with the illuminated region.

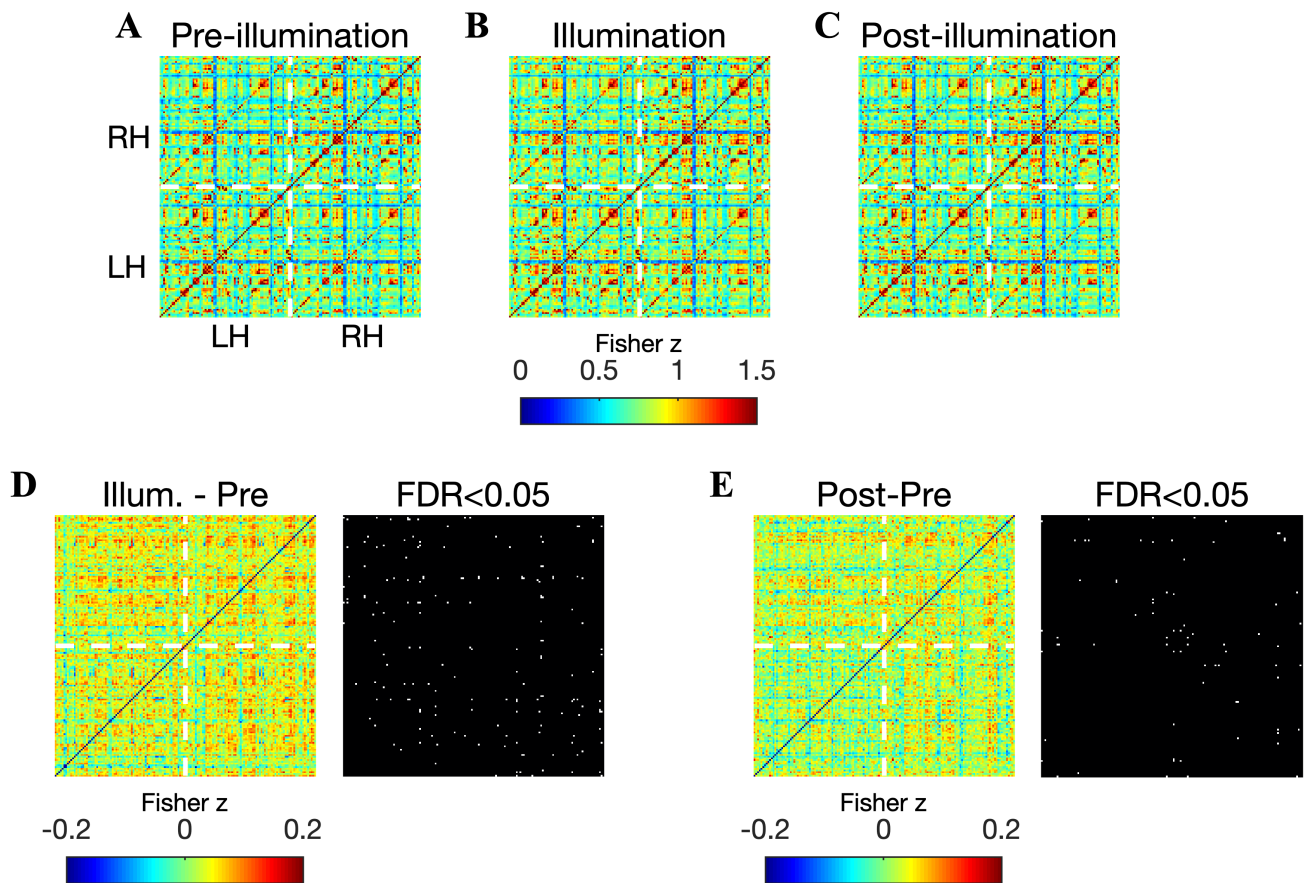

Figure S4: Increased functional connectivity with seeds outside of the illuminated region (Echo 1). (A) Matrix showing the Fisher transformed Pearson correlation between all pairs of 151 ROI time courses before illumination. (B) Same as (A) but now for the illumination period. (C) Correlation matrix for the period after illumination. (D) The difference in correlation matrices measured during and before illumination. 116 connections exhibited significant increases. (E) Same as (D) but now between the post- and pre-illumination periods. 44 significant connections were detected.

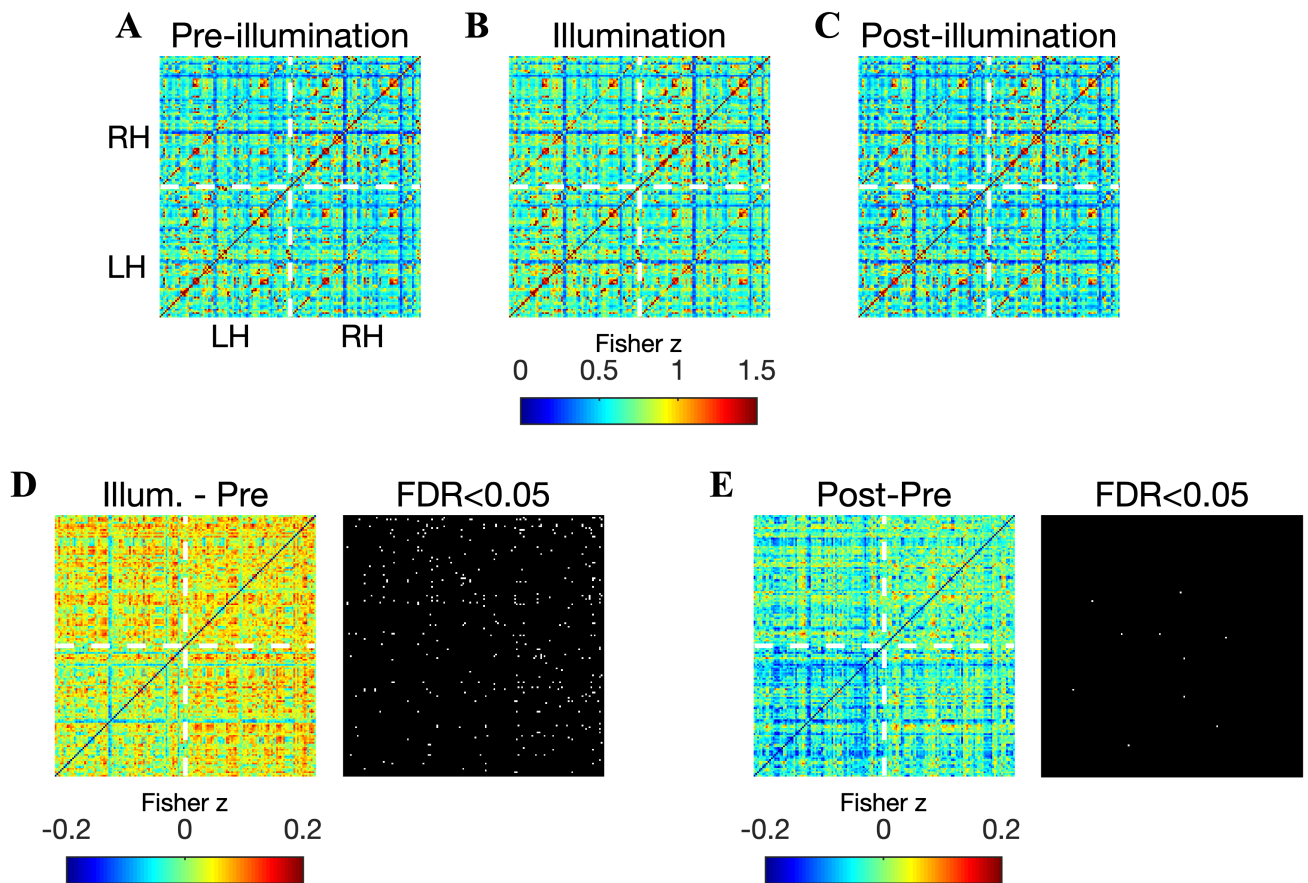

Figure S5: Increased functional connectivity with seeds outside of the illuminated region (Echo 2). Panels match those of Fig S4. 259 connections exhibited significant increases during illumination, while 7 showed increased connectivity following tPBM.

| <b>Echo 1</b>                  | <b>Echo 2</b>               | <b>Echo 3</b>               |
|--------------------------------|-----------------------------|-----------------------------|
| lh_G_cingul-Post-dorsal        | lh_G_and_S_occipital_inf    | lh_G_and_S_occipital_inf    |
| lh_G_pariet_inf-Angular        | lh_G_oc-temp_lat-fusifor    | lh_G_cingul-Post-dorsal     |
| lh_G_precentral                | lh_G_parietal_sup           | lh_G_cingul-Post-ventral    |
| lh_G_precuneus                 | lh_G_postcentral            | lh_G_cuneus                 |
| lh_S_front_inf                 | lh_G_precentral             | lh_G_occipital_middle       |
| lh_S_intrapariet_and_P_tran    | lh_S_central                | lh_G_oc-temp_lat-fusifor    |
| lh_S_subparietal               | lh_S_intrapariet_and_P_tran | lh_G_oc-temp_med-Lingual    |
| rh_G_cingul-Post-dorsal        | lh_S_postcentral            | lh_G_parietal_sup           |
| rh_G_front_inf-Orbital         | lh_S_precentral-sup-part    | lh_G_postcentral            |
| rh_G_pariet_inf-Angular        | rh_G_parietal_sup           | lh_G_precentral             |
| rh_G_postcentral               | rh_G_postcentral            | lh_G_precuneus              |
| rh_G_precuneus                 | rh_G_precentral             | lh_G_temporal_inf           |
| rh_G_temp_sup-Lateral          | rh_S_central                | lh_Pole_occipital           |
| rh_Lat_Fis-ant-Horizont        | rh_S_front_sup              | lh_S_calcarine              |
| rh_S_central                   | rh_S_postcentral            | lh_S_occipital_ant          |
| rh_S_subparietal               | rh_S_precentral-sup-part    | lh_S_parieto_occipital      |
| rh_S_temporal_inf              |                             | lh_S_postcentral            |
| rh_S_temporal_sup              |                             | lh_S_precentral-sup-part    |
| <i>lh_G_cingul-Post-dorsal</i> |                             | lh_S_subparietal            |
| <i>lh_S_subparietal</i>        |                             | rh_G_and_S_paracentral      |
| <i>rh_G_cingul-Post-dorsal</i> |                             | rh_G_cingul-Post-dorsal     |
|                                |                             | rh_G_cingul-Post-ventral    |
|                                |                             | rh_G_cuneus                 |
|                                |                             | rh_G_occipital_sup          |
|                                |                             | rh_G_oc-temp_med-Lingual    |
|                                |                             | rh_G_parietal_sup           |
|                                |                             | rh_G_postcentral            |
|                                |                             | rh_G_precentral             |
|                                |                             | rh_G_precuneus              |
|                                |                             | rh_Pole_occipital           |
|                                |                             | rh_S_calcarine              |
|                                |                             | rh_S_central                |
|                                |                             | rh_S_intrapariet_and_P_tran |
|                                |                             | rh_S_parieto_occipital      |
|                                |                             | rh_S_pericallosal           |
|                                |                             | rh_S_postcentral            |
|                                |                             | rh_S_precentral-sup-part    |
|                                |                             | rh_S_subparietal            |

Table S2: ROIs exhibiting significantly increased FC with the illuminated region. The labels correspond to short names of the cortical regions comprising the Destrieux atlas. For unabbreviated labels, please refer to Table 1 of Destrieux et al. (2010). Italicized entries denote a significant FC increase after illumination.
